# Supplementary material
Source: Springer Nature journal article supplement (https://www.springermedizin.de/resource/supplementary/12903_2014_392_MOESM4_ESM.pdf/9516936)
Supplement: MOESM4 [file 9516936]

**Figure 2 – Details of 48 papers identified from literature review and reason for exclusion**

| -  | <u>Authors</u>           | <u>Title</u>                                                                                                                     | <u>Journal</u>                           | <u>Date</u> | <u>Type of Article</u> | <u>Reason for exclusion</u>                                                                                        |
|----|--------------------------|----------------------------------------------------------------------------------------------------------------------------------|------------------------------------------|-------------|------------------------|--------------------------------------------------------------------------------------------------------------------|
| 1  | Bauer, J., et al.        | Interdisciplinary resources optimize Evidence-Based Dental Practice                                                              | J Evid Based Dent Pract                  | 2005        | <b>O</b>               | NOT PRIMARY RESEARCH                                                                                               |
| 2  | Bedos, C., et al.        | Patient-centred approaches: new models for new challenges                                                                        | J. of the Canadian Dental Assoc          | 2011        | <b>O</b>               | NOT PRIMARY RESEARCH                                                                                               |
| 3  | Brennan, M., et al.      | Patient satisfaction and oral health-related quality of life outcomes of implant overdentures and fixed complete dentures        | Int J Oral Maxillofac Implants           | 2010        | <b>QUAN</b>            | Concerned with patient-centred outcomes and patient satisfaction rather than PCC                                   |
| 4  | Chapple, H., et al.      | Exploring dental patients' preferred roles in treatment decision-making - a novel approach                                       | British Dental Journal                   | 2003        | <b>QR</b>              | Focuses on SDM rather than PCC                                                                                     |
| 5  | Cobb, D. S.              | Patient-centered care in an academic health center: faculty perspective                                                          | J Dent Educ                              | 1996        | <b>O</b>               | NOT PRIMARY RESEARCH                                                                                               |
| 6  | Cohen, L. A., et al.     | Comparison of patient centeredness of visits to emergency departments, physicians, and dentists for dental problems and injuries | J Am Coll Dent                           | 2010        | <b>QUAN</b>            | Assessment of level of PCC following dental injury using NHQR questionnaire rather than defining dimensions of PCC |
| 7  | Dierens, M., et al.      | Patient-centered outcome of immediately loaded implants in the rehabilitation of fully edentulous jaws                           | Clinical Oral Implants Research          | 2009        | <b>QUAN</b>            | Concerned with patient-centred outcomes rather than PCC                                                            |
| 8  | Eriksen, H. M., et al.   | A patient-centred approach to teaching and learning in dental student clinical practice                                          | Eur J Dent Educ                          | 2008        | <b>O</b>               | NOT PRIMARY RESEARCH                                                                                               |
| 9  | Fernandes, L., et al.    | Patient-centered evaluation of orthodontic care: a longitudinal cohort study of children's and parents' attitudes                | Am J. of Ortho & Dentofacial Orthopedics | 1999        | <b>QUAN</b>            | Concerned with patient-centred outcomes rather than PCC                                                            |
| 10 | Formicola, A. J., et al. | Evolution of dental school clinics as patient care delivery centers                                                              | J Dent Educ                              | 2006        | <b>R</b>               | NOT PRIMARY RESEARCH                                                                                               |
| 11 | Formicola, A. J., et al. | Evolution of dental school clinics as patient care delivery centers                                                              | J Dent Educ                              | 2008        | <b>R</b>               | NOT PRIMARY RESEARCH                                                                                               |
| 12 | Freeman, R.              | Communicating with children and parents: recommendations for a child-parent-centred approach for paediatric dentistry            | Eur Arch Paediatr Dent                   | 2008        | <b>R</b>               | NOT PRIMARY RESEARCH                                                                                               |

|    |                        |                                                                                                                                              |                                   |      |             |                                                                              |
|----|------------------------|----------------------------------------------------------------------------------------------------------------------------------------------|-----------------------------------|------|-------------|------------------------------------------------------------------------------|
| 13 | Gerbert, B., et al.    | The provider-patient relationship in academic health centers: the movement toward patient-centered care                                      | J Dent Educ                       | 1996 | <b>O</b>    | NOT PRIMARY RESEARCH                                                         |
| 14 | Gold, S. A.            | Managing the patient-centered practice                                                                                                       | J Calif Dent Assoc                | 2000 | <b>O</b>    | NOT PRIMARY RESEARCH                                                         |
| 15 | Hegarty, A. M., et al. | Patient-centred outcome measures in oral medicine: are they valid and reliable?                                                              | Int J Oral Maxillofac Surg        | 2002 | <b>QUAN</b> | Study to compare patient-centred outcome measures and not PCC                |
| 16 | Heymann, H. O.         | The "patient-centered" practice                                                                                                              | J Esthet Restor Dent              | 2008 | <b>O</b>    | NOT PRIMARY RESEARCH                                                         |
| 17 | Hietasalo, P., et al.  | Cost-effectiveness of an experimental caries-control regimen in a 3.4-yr randomized clinical trial among 11-12-yr-old Finnish schoolchildren | European Journal Of Oral Sciences | 2009 | <b>QUAN</b> | "Patient-centred" used solely as a descriptive term and no reference to PCC. |
| 18 | Jones, C., et al.      | Darzi and Dentistry: The Emerging Quality Agenda for GPs in England                                                                          | Dental Update                     | 2009 | <b>O</b>    | NOT PRIMARY RESEARCH                                                         |
| 19 | Hislop, J. M.          | Chapter 7: PATIENT-CENTERED COMMUNICATION                                                                                                    | Dental Communication Unlimited    | 1999 | <b>O</b>    | NOT PRIMARY RESEARCH                                                         |
| 20 | Kalkwarf, K. L.        | Patient-centered care in an academic health center: an administrator's perspective                                                           | J Dent Educ                       | 1996 | <b>O</b>    | NOT PRIMARY RESEARCH                                                         |
| 21 | Kalkwarf, K. L.        | Patient-centered care and today's dental practice                                                                                            | J Am Coll Dent                    | 1997 | <b>O</b>    | NOT PRIMARY RESEARCH                                                         |
| 22 | Kulich, K. R., et al.  | A qualitative analysis of patient-centered dentistry in consultations with dental phobic patients                                            | Journal Of Health Communication   | 2003 | <b>QR</b>   | INCLUDED                                                                     |
| 23 | Levine, R. A.          | A patient-centered periodontal program for the 1990s, Part II                                                                                | Compendium                        | 1990 | <b>R</b>    | NOT PRIMARY RESEARCH                                                         |
| 24 | Levine, R. A.          | A patient-centered periodontal program for the 1990s, Part I                                                                                 | Compendium                        | 1990 | <b>R</b>    | NOT PRIMARY RESEARCH                                                         |
| 25 | Loignon, C., et al.    | Providing humanistic care: dentists' experiences in deprived areas                                                                           | Journal of Dental Research        | 2010 | <b>QR</b>   | INCLUDED                                                                     |
| 26 | Logan, H. L.           | What does patient-centered care mean in an academic health center? A conclusion                                                              | J Dent Educ                       | 1996 | <b>O</b>    | NOT PRIMARY RESEARCH                                                         |

|    |                         |                                                                                                                        |                                                 |      |             |                                                                                                              |
|----|-------------------------|------------------------------------------------------------------------------------------------------------------------|-------------------------------------------------|------|-------------|--------------------------------------------------------------------------------------------------------------|
| 27 | Logan, H. L.            | What does patient-centered care mean in an academic health center? An introduction                                     | J Dent Educ                                     | 1996 | <b>O</b>    | NOT PRIMARY RESEARCH                                                                                         |
| 28 | Madhan, B., et al.      | Attitudes of postgraduate orthodontic students in India towards patient-centered care                                  | J Dent Educ                                     | 2011 | <b>QUAN</b> | Assessment of level of PCC of ortho students using PPOS questionnaire rather than defining dimensions of PCC |
| 29 | Mahajan, A., et al.     | A Patient-Centered Clinical Evaluation of Acellular Dermal Matrix Graft in the Treatment of Gingival Recession Defects | Journal of Periodontology                       | 2007 | <b>QUAN</b> | Concerned with patient-centred outcomes and patient satisfaction rather than PCC                             |
| 30 | McGrath, C., et al.     | Patient-centred outcome measures in oral surgery: validity and sensitivity                                             | Br J Oral Maxillofac Surg                       | 2003 | <b>QUAN</b> | Concerned with patient-centred outcomes rather than PCC                                                      |
| 31 | McGrath, C., et al.     | Patient-centred outcome measures for oral mucosal disease are sensitive to treatment                                   | Int J Oral Maxillofac Surg                      | 2003 | <b>QUAN</b> | Concerned with patient-centred outcomes rather than PCC                                                      |
| 32 | McGrath, C., et al.     | Patient-centred measures in dental practice: 2. Quality of life                                                        | Dent Update                                     | 2007 | <b>R</b>    | NOT PRIMARY RESEARCH                                                                                         |
| 33 | McNair, A., et al.      | A qualitative study to develop a tool to examine patients' perceptions of NHS orthodontic treatment                    | Journal of Orthodontics                         | 2006 | <b>QR</b>   | Concerned with patient-centred outcomes and patient satisfaction rather than PCC                             |
| 34 | Miles, L. L.            | The patient-centered practice                                                                                          | J Calif Dent Assoc                              | 2000 | <b>O</b>    | NOT PRIMARY RESEARCH                                                                                         |
| 35 | Newsome, P., et al.     | Patient-centred measures in dental practice: 1. An overview                                                            | Dent Update                                     | 2006 | <b>R</b>    | NOT PRIMARY RESEARCH                                                                                         |
| 36 | Newsome, P., et al.     | Patient-centred measures in dental practice: 3. Patient satisfaction                                                   | Dent Update                                     | 2007 | <b>O</b>    | NOT PRIMARY RESEARCH                                                                                         |
| 37 | Ni Riordain, R., et al. | A patient-centered approach to developing a quality-of-life questionnaire for chronic oral mucosal diseases            | Oral Surg, Oral Med, Oral Path, Oral Rad & Endo | 2011 | <b>QR</b>   | Concerned with patient-centred outcomes rather than PCC                                                      |
| 38 | Nimmo, A., et al.       | Patient-centered competency-based education in fixed prosthodontics                                                    | J Prosthodont                                   | 1996 | <b>R</b>    | NOT PRIMARY RESEARCH                                                                                         |
| 39 | Pastagia, J., et al.    | The effect of patient-centered plaque control and periodontal maintenance therapy on adverse outcomes of periodontitis | The Journal Of Evidence-Based Dental Practice   | 2006 | <b>R</b>    | NOT PRIMARY RESEARCH                                                                                         |

|    |                        |                                                                                                                                  |                                       |      |             |                                                           |
|----|------------------------|----------------------------------------------------------------------------------------------------------------------------------|---------------------------------------|------|-------------|-----------------------------------------------------------|
| 40 | Phillips, C.           | Patient-centered outcomes in surgical and orthodontic treatment                                                                  | Semin Orthod                          | 1999 | <b>O</b>    | NOT PRIMARY RESEARCH                                      |
| 41 | Roskell, C., et al.    | Developing patient-centred care in health professionals: reflections on introducing service-learning into the curriculum         | Int J of Therapy & Rehab              | 2012 | <b>QR</b>   | Pilot study to promote PCC rather than explore dimensions |
| 42 | Sachdeva, R. C.        | SureSmile technology in a patient--centered orthodontic practice                                                                 | Journal Of Clinical Orthodontics: JCO | 2001 | <b>O</b>    | NOT PRIMARY RESEARCH                                      |
| 43 | Scambler, S., et al.   | Professional attitudes towards disability in special care dentistry                                                              | Journal of Disability & Oral Health   | 2011 | <b>QR</b>   | INCLUDED                                                  |
| 44 | Shenkin, J. D.         | Patient-Centered Caries Prevention in Children may be More Cost-Effective in the Long Term than Traditional Dental Care          | J Evid Based Dent Pract               | 2011 | <b>R</b>    | NOT PRIMARY RESEARCH                                      |
| 45 | Stutts, L. A., et al.  | Patient-Centered Outcome Criteria for Successful Treatment of Facial Pain and Fibromyalgia                                       | Journal of Orofacial Pain             | 2009 | <b>QUAN</b> | Concerned with patient-centred outcomes rather than PCC   |
| 46 | Travess, H. C., et al. | The development of a patient-centered measure of the process and outcome of combined orthodontic and orthognathic treatment      | J Orthod                              | 2004 | <b>QR</b>   | Concerned with patient-centred outcomes rather than PCC   |
| 47 | Tresolini, C. P.       | Health care relationships: instruments for effective patient-focused care in the academic health center                          | J Dent Educ                           | 1996 | <b>O</b>    | NOT PRIMARY RESEARCH                                      |
| 48 | Weinstein, P.          | Provider versus patient-centered approaches to health promotion with parents of young children: what works/does not work and why | Pediatr Dent                          | 2006 | <b>O</b>    | NOT PRIMARY RESEARCH                                      |

**Key – type of article**

- QUAN** - Primary research using **quantitative** methodology  
**QR** - Primary research using **qualitative** methodology  
**O** - Opinion article  
**R** - Narrative review
